# Supplementary material for: NDR Kinases Are Essential for Somitogenesis and Cardiac Looping during Mouse Embryonic Development
Source: PLoS One. 2015 Aug 25;10(8):e0136566. doi: 10.1371/journal.pone.0136566 (PMC4549247; doi:10.1371/journal.pone.0136566)
Supplement: S2 Table — Transcript levels were compared between control and Ndr1/2-double null embryos. Pooled transcripts obtained from three Ndr1/2-double null and three control littermate embryos were compared. Only genes whose expression is significantly altered are listed (p ≤ 0.05). A detailed description of the applied statistical analyses is provided in the Materials and Methods section. (XLS) [file pone.0136566.s008.xls]

## Sheet: raw data
probeset_id	logFC	AveExpr	t	P.Value	adj.P.Val	B	Accession	Gene_symbol	Description	Symbol_2	FC	1/FC
10601088	-1.99987	6.7961	-11.6861	1.43e-05	0.350702	0.778213	XR_031413	EG668271	predicted gene, EG668271		0.250022	3.99965
10417408	-1.3299	3.86924	-3.9661	0.00642737	0.698833	-2.08379	ENSMUST00000112794	100040797	predicted gene, 100040797	100040923	0.397797	2.51385
10536143	-1.15354	4.46521	-2.55158	0.0408413	0.738284	-3.47154	ENSMUST00000115900	EG620639	predicted gene, EG620639	624421	0.449522	2.22459
10565589	-1.07186	5.71821	-5.37788	0.00135905	0.59552	-1.07785	NM_001111282	Hmg1l1	high-mobility group (nonhistone chromosomal) protein 1-like 1	Hmgb1	0.475706	2.10214
10378783	-0.866267	5.76888	-2.43109	0.0483658	0.744339	-3.60454	NM_018730	Rpl36	ribosomal protein L36	Rpl36	0.548564	1.82294
10505543	-0.75468	4.63252	-3.40318	0.0129652	0.717948	-2.59138	NM_001081644	Gm428	gene model 428, (NCBI)	Gm428	0.592678	1.68726
10412549	-0.731761	6.94294	-7.3279	0.00023833	0.517771	-0.17734	NM_177135	D830030K20Rik	RIKEN cDNA D830030K20 gene	D830030K20Rik	0.602168	1.66067
10417245	-0.72406	5.19265	-3.82036	0.00767224	0.705227	-2.20911	ENSMUST00000112794	100040797	predicted gene, 100040797	100040923	0.605391	1.65182
10570706	-0.709752	3.1765	-3.52938	0.0110317	0.712836	-2.47208	NM_183268	Defcr20	defensin related cryptdin 20	Defcr20	0.611425	1.63552
10391504	-0.68865	8.14421	-6.50023	0.00047507	0.569005	-0.504337	NM_010791	Meox1	mesenchyme homeobox 1	Meox1	0.620434	1.61177
10500683	-0.667231	8.08795	-5.97372	0.000763947	0.569005	-0.752321	ENSMUST00000038644	Rangrf	RAN guanine nucleotide release factor	Rangrf	0.629714	1.58802
10523341	-0.634491	3.24605	-2.64315	0.0359477	0.738284	-3.37151	NM_177187	D5Ertd577e	DNA segment, Chr 5, ERATO Doi 577, expressed	E330014E10Rik	0.644168	1.55239
10608482	-0.628048	5.20602	-2.77752	0.0298568	0.738284	-3.22671	ENSMUST00000115889	LOC665746	similar to spermiogenesis specific transcript on the Y 1	LOC100042626	0.647052	1.54547
10417264	-0.627273	8.3089	-2.34219	0.0548333	0.748921	-3.70349	BC089473	ENSMUSG00000063277	predicted gene, ENSMUSG00000063277	ENSMUSG00000068790	0.647399	1.54464
10599291	-0.619629	2.91451	-2.57174	0.0397068	0.738284	-3.44943	NM_201236	Rhox4e	reproductive homeobox 4E	Rhox4b	0.650838	1.53648
10417319	-0.616564	6.08992	-4.21038	0.00481172	0.672083	-1.88321	NM_177135	D830030K20Rik	RIKEN cDNA D830030K20 gene	D830030K20Rik	0.652223	1.53322
10543333	-0.590211	8.76902	-5.95478	0.000777558	0.569005	-0.761899	NM_013930	Aass	aminoadipate-semialdehyde synthase	Aass	0.664246	1.50547
10474312	-0.578423	7.68487	-4.61306	0.00304425	0.658413	-1.57781	NM_013627	Pax6	paired box gene 6	Pax6	0.669695	1.49322
10439321	-0.576881	4.91497	-2.76424	0.0304067	0.738284	-3.2409	NM_021301	Slc15a2	solute carrier family 15 (H+	ENSMUST00000023616	0.670412	1.49162
10606600	-0.54852	6.38897	-3.76646	0.00819813	0.705227	-2.25654	NM_001105245	Pcdh19	protocadherin 19	Pcdh19	0.683721	1.46258
10411147	-0.521233	7.41403	-3.09176	0.0195068	0.717948	-2.89891	NM_022884	Bhmt2	betaine-homocysteine methyltransferase 2	Bhmt2	0.696776	1.43518
10600122	-0.505932	6.0123	-2.40108	0.0504556	0.744339	-3.63787	NM_001081643	Xlr3b	X-linked lymphocyte-regulated 3B	Xlr3c	0.704205	1.42004
10514558	-0.487573	9.17465	-4.79237	0.00250168	0.620965	-1.45153	XR_004941	OTTMUSG00000008006	predicted gene, OTTMUSG00000008006		0.713224	1.40208
10351035	-0.486648	9.97453	-2.54268	0.0413525	0.738284	-3.48131	NR_002840	Gas5	growth arrest specific 5		0.713682	1.40119
10404407	-0.485682	7.52634	-4.79189	0.00250299	0.620965	-1.45187	NM_008592	Foxc1	forkhead box C1	Foxc1	0.714159	1.40025
10564507	-0.480516	7.00748	-3.5863	0.0102648	0.710389	-2.41931	NM_001042592	Arrdc4	arrestin domain containing 4	Arrdc4	0.716721	1.39524
10353219	-0.474042	8.9555	-5.96933	0.000767076	0.569005	-0.754536	NM_133354	Sumo2	SMT3 suppressor of mif two 3 homolog 2 (yeast)	Sumo2	0.719945	1.389
10449527	-0.473913	7.75678	-4.9461	0.00212183	0.596685	-1.34783	NM_134115	Stk38	serine	ENSMUST00000009138	0.720009	1.38887
10414228	-0.473691	4.49054	-2.5525	0.0407885	0.738284	-3.47052	BC049649	EG434459	predicted gene, EG434459	1700024B05Rik	0.72012	1.38866
10548622	-0.470223	3.61362	-5.10365	0.00179833	0.596685	-1.24576	NM_198669	Prb1	proline-rich protein BstNI subfamily 1	Prpmp5	0.721853	1.38532
10447629	-0.466854	7.56594	-4.40925	0.00382657	0.658413	-1.72853	NM_147155	Tagap1	T-cell activation GTPase activating protein 1	Tagap1	0.723541	1.38209
10503659	-0.458602	7.81278	-5.55015	0.00114545	0.59552	-0.978412	NM_010141	Epha7	Eph receptor A7	Epha7	0.727691	1.37421
10490913	-0.455245	6.43474	-2.95336	0.023492	0.718198	-3.04126	NM_007606	Car3	carbonic anhydrase 3	Car3	0.729386	1.37102
10408687	-0.454992	5.52762	-3.26606	0.0154933	0.717948	-2.72453	BC064790	Hmgb1	high mobility group box 1		0.729514	1.37078
10415957	-0.453757	4.12956	-4.02842	0.00596465	0.698833	-2.03149	XR_034757	100043657	predicted gene, 100043657		0.730139	1.3696
10563112	-0.451897	7.55697	-3.21659	0.0165327	0.717948	-2.77344	NR_001277	Snord33	small nucleolar RNA, C		0.731081	1.36784
10441813	-0.451604	6.63229	-2.77879	0.0298045	0.738284	-3.22535	AF357405	Tcp1	t-complex protein 1		0.731229	1.36756
10368222	-0.451073	5.68423	-5.92919	0.00079639	0.569005	-0.774918	NM_053264	4930444G20Rik	RIKEN cDNA 4930444G20 gene	4930444G20Rik	0.731498	1.36706
10570612	-0.450554	3.37602	-3.272	0.0153733	0.717948	-2.71868	NM_030734	Defb5	defensin beta 5	Defb5	0.731762	1.36656
10368277	-0.448525	8.42146	-5.82407	0.00087934	0.587805	-0.829323	AF357393	Rps12	ribosomal protein S12		0.732791	1.36464
10405179	-0.446147	6.72888	-3.64187	0.00957208	0.705227	-2.36841	NM_010101	S1pr3	sphingosine-1-phosphate receptor 3	S1pr3	0.734	1.3624
10576216	-0.445285	7.28565	-3.86046	0.00730513	0.705227	-2.17421	AF357327	Rpl13	ribosomal protein L13		0.734439	1.36158
10392560	-0.433944	5.12766	-2.59811	0.0382725	0.738284	-3.42058	NM_147220	Abca9	ATP-binding cassette, sub-family A (ABC1), member 9	Abca9	0.740235	1.35092
10356329	-0.433438	8.30271	-2.61703	0.0372775	0.738284	-3.39994	AF357416	Ncl	nucleolin		0.740495	1.35045
10543362	-0.432877	6.95435	-2.34946	0.0542725	0.748266	-3.69538	BC119565	Fezf1	Fez family zinc finger 1	Fezf1	0.740783	1.34992
10583318	-0.430784	8.80391	-4.64144	0.00295021	0.649046	-1.55744	BC056964	Josd3	Josephin domain containing 3		0.741859	1.34797
10604076	-0.429474	6.86213	-2.4462	0.0473475	0.743552	-3.58778	NR_002900	Snora69	small nucleolar RNA, H		0.742532	1.34674
10461156	-0.427435	9.79208	-3.62218	0.00981146	0.705227	-2.38637	AK051045	Snhg1	small nucleolar RNA host gene (non-protein coding) 1		0.743583	1.34484
10479809	-0.426436	8.02735	-3.03854	0.0209458	0.717948	-2.95325	NM_016844	Rps28	ribosomal protein S28	Rps28	0.744098	1.34391
10570432	-0.426146	8.62899	-5.35754	0.00138712	0.59552	-1.0899	AF357390	Rpl27a	ribosomal protein L27a		0.744247	1.34364
10502772	-0.424127	6.77678	-2.67212	0.0345313	0.738284	-3.34008	NM_001081298	Lphn2	latrophilin 2	Lphn2	0.745289	1.34176
10436890	-0.420733	5.79661	-4.43013	0.00373691	0.658413	-1.71273	ENSMUST00000114029	ENSMUSG00000074911	predicted gene, ENSMUSG00000074911		0.747045	1.33861
10521892	-0.419346	6.76662	-4.1911	0.00492128	0.673478	-1.89861	NM_011402	Slc34a2	solute carrier family 34 (sodium phosphate), member 2	Slc34a2	0.747764	1.33732
10452295	-0.418035	6.22603	-3.99816	0.0061845	0.698833	-2.05678	NM_009451	Tubb4	tubulin, beta 4	Tubb4	0.748443	1.33611
10510230	-0.415854	6.34801	-2.475	0.0454686	0.742364	-3.5559	BC058613	OTTMUSG00000010671	predicted gene, OTTMUSG00000010671	OTTMUSG00000010673	0.749576	1.33409
10348896	-0.414138	4.26689	-3.3665	0.0135942	0.717948	-2.62664	NM_199366	Gal3st2	galactose-3-O-sulfotransferase 2	Gal3st2	0.750468	1.3325
10557488	-0.413795	7.04162	-5.56761	0.001126	0.59552	-0.968583	NM_011538	Tbx6	T-box 6	Tbx6	0.750646	1.33219
10507273	-0.412829	7.58643	-4.72517	0.0026912	0.648904	-1.49818	NM_181585	Pik3r3	phosphatidylinositol 3 kinase, regulatory subunit, polypeptide 3 (p55)	Pik3r3	0.751149	1.33129
10436487	-0.411305	6.35636	-4.88021	0.0022761	0.620649	-1.39177	ENSMUST00000116587	Vgll3	vestigial like 3 (Drosophila)	Vgll3	0.751943	1.32989
10453260	-0.410808	6.70556	-2.80242	0.0288531	0.738284	-3.20015	NM_025325	Haao	3-hydroxyanthranilate 3,4-dioxygenase	Haao	0.752202	1.32943
10563114	-0.410665	8.51396	-4.22249	0.00474426	0.671165	-1.87357	NR_000002	Snord32a	small nucleolar RNA, C	BC065799	0.752277	1.3293
10462846	-0.409808	7.78473	-3.26595	0.0154955	0.717948	-2.72463	BC151098	Cyp26c1	cytochrome P450, family 26, subfamily c, polypeptide 1	Cyp26c1	0.752723	1.32851
10586865	-0.409433	9.01743	-2.98722	0.0224423	0.718007	-3.00613	NM_009022	Aldh1a2	aldehyde dehydrogenase family 1, subfamily A2	Aldh1a2	0.752919	1.32816
10522465	-0.408043	8.53295	-6.49977	0.000475261	0.569005	-0.504539	ENSMUST00000066220	2700023E23Rik	RIKEN cDNA 2700023E23 gene		0.753645	1.32689
10355401	-0.405699	8.25845	-2.41129	0.0497343	0.744339	-3.62652	ENSMUST00000074038	Acp1	acid phosphatase 1, soluble		0.75487	1.32473
10563110	-0.402881	7.50116	-4.71401	0.00272423	0.648904	-1.50601	NR_002455	Snord34	small nucleolar RNA, C	BC065799	0.756346	1.32215
10568461	-0.402151	8.20335	-3.18096	0.0173282	0.717948	-2.80896	NM_146218	Rfwd3	ring finger and WD repeat domain 3	Rfwd3	0.756729	1.32148
10576795	-0.400557	7.84439	-3.06092	0.0203273	0.717948	-2.93034	ENSMUST00000111031	Cd209a	CD209a antigen		0.757566	1.32002
10576051	-0.399198	7.98997	-3.22153	0.0164257	0.717948	-2.76854	NM_013519	Foxc2	forkhead box C2	Foxc2	0.75828	1.31877
10458130	-0.399159	3.81167	-3.74923	0.00837454	0.705227	-2.27183	NM_177773	4933408B17Rik	RIKEN cDNA 4933408B17 gene	4933408B17Rik	0.7583	1.31874
10601569	-0.397443	4.75655	-5.28641	0.00149051	0.59552	-1.13252	NM_001081385	Pcdh11x	protocadherin 11 X-linked	Pcdh11x	0.759202	1.31717
10353034	-0.39616	7.64916	-4.46755	0.00358203	0.658413	-1.68462	NR_004410	Rnu87	RNA, U87 small nucleolar		0.759878	1.316
10357097	-0.395825	4.34362	-4.67431	0.00284536	0.648904	-1.53402	XR_033060	EG435640	predicted gene, EG435640		0.760055	1.31569
10513497	-0.395148	4.62974	-3.12206	0.0187354	0.717948	-2.86819	NM_001045550	Mup2	major urinary protein 2	Mup2	0.760412	1.31508
10453394	-0.390203	6.56447	-2.83556	0.0275734	0.738284	-3.16496	NM_011380	Six2	sine oculis-related homeobox 2 homolog (Drosophila)	Six2	0.763022	1.31058
10416945	-0.389992	7.60038	-2.8745	0.0261462	0.734415	-3.12382	AK053349	5033413D16Rik	RIKEN cDNA 5033413D16 gene		0.763134	1.31039
10566142	-0.388864	6.1333	-3.37726	0.0134063	0.717948	-2.61627	BC064790	Hmgb1	high mobility group box 1	Hmgb1	0.763731	1.30936
10608521	-0.388585	3.21873	-4.56593	0.00320787	0.658413	-1.61198	NM_009220	Ssty1	spermiogenesis specific transcript on the Y 1	LOC100040223	0.763879	1.30911
10461154	-0.388468	8.28092	-2.93321	0.0241414	0.722391	-3.06226	AK051045	Snhg1	small nucleolar RNA host gene (non-protein coding) 1		0.76394	1.309
10453732	-0.387443	4.18955	-5.70572	0.000984654	0.591547	-0.892417	XR_031272	EG225134	predicted gene, EG225134		0.764483	1.30807
10466839	-0.386286	6.49378	-2.59045	0.0386836	0.738284	-3.42895	XR_034316	433233	predicted gene, 433233		0.765097	1.30702
10354739	-0.386238	7.44064	-2.47321	0.0455834	0.742364	-3.55789	NM_013795	Atp5l	ATP synthase, H+ transporting, mitochondrial F0 complex, subunit g	OTTMUSG00000002778	0.765122	1.30698
10415875	-0.385856	8.59637	-3.48382	0.0116908	0.716404	-2.51479	NM_028228	2610028A01Rik	RIKEN cDNA 2610028A01 gene	2610028A01Rik	0.765325	1.30663
10461148	-0.383845	6.7379	-2.70329	0.0330733	0.738284	-3.3064	AK051045	Snhg1	small nucleolar RNA host gene (non-protein coding) 1		0.766392	1.30481
10356333	-0.38224	6.55377	-2.50644	0.0435058	0.738284	-3.52119	NR_002851	Snord82	small nucleolar RNA, C		0.767245	1.30336
10448034	-0.378311	7.08939	-5.12074	0.0017667	0.596685	-1.23494	NM_007865	Dll1	delta-like 1 (Drosophila)	Dll1	0.769338	1.29982
10570957	-0.377794	8.10913	-3.82863	0.00759492	0.705227	-2.20189	NM_013834	Sfrp1	secreted frizzled-related protein 1	Sfrp1	0.769614	1.29935
10583310	-0.376671	8.1404	-2.69173	0.0336062	0.738284	-3.31887	BC056964	Josd3	Josephin domain containing 3		0.770213	1.29834
10461152	-0.376474	10.0247	-3.45932	0.0120629	0.717948	-2.53793	AK051045	Snhg1	small nucleolar RNA host gene (non-protein coding) 1		0.770318	1.29817
10416126	-0.376087	5.56142	-6.02198	0.000730469	0.569005	-0.728134	NM_010095	Ebf2	early B-cell factor 2	Ebf2	0.770524	1.29782
10560787	-0.374936	3.93809	-2.43764	0.0479218	0.744339	-3.59727	NM_207547	V1rd21	vomeronasal 1 receptor, D21	V1rd21	0.771139	1.29678
10445239	-0.373419	8.55276	-2.38391	0.0516936	0.746416	-3.65698	ENSMUST00000071458	EG546797	predicted gene, EG546797	EG546797	0.771951	1.29542
10542555	-0.370524	6.16497	-4.05559	0.0057745	0.698833	-2.00893	BC006653	MGC7817	hypothetical protein LOC620031		0.773501	1.29282
10376832	-0.36979	7.90503	-2.99437	0.0222271	0.718007	-2.99874	NM_007413	Adora2b	adenosine A2b receptor	Adora2b	0.773895	1.29217
10468081	-0.369497	9.21267	-3.29296	0.0149579	0.717948	-2.69812	NM_008723	Npm3	nucleoplasmin 3	Npm3	0.774053	1.2919
10536103	-0.367844	6.51657	-3.25806	0.0156564	0.717948	-2.7324	ENSMUST00000115900	EG620639	predicted gene, EG620639	624421	0.77494	1.29042
10408359	-0.367805	5.27243	-2.98141	0.0226185	0.718007	-3.01214	NM_009513	Nrsn1	neurensin 1	Nrsn1	0.774961	1.29039
10404284	-0.365495	3.36909	-3.77243	0.00813794	0.705227	-2.25126	NM_172156	Prl3d3	prolactin family 3, subfamily d, member 3	Prl3d3	0.776203	1.28832
10561376	-0.36293	7.13072	-2.52747	0.0422423	0.738284	-3.49803	NM_007866	Dll3	delta-like 3 (Drosophila)	Dll3	0.777584	1.28603
10598087	-0.36282	10.0207	-2.53106	0.0420307	0.738284	-3.49408	ENSMUST00000082419	ND6	NADH dehydrogenase subunit 6		0.777643	1.28594
10399387	-0.360465	7.27244	-3.56792	0.0105058	0.711537	-2.43627	NM_019544	Msgn1	mesogenin 1	Msgn1	0.778914	1.28384
10410919	-0.36042	5.93855	-4.18201	0.00497391	0.676499	-1.90589	XR_034009	EG435373	predicted gene, EG435373		0.778938	1.2838
10394142	-0.360111	8.40791	-3.15083	0.0180331	0.717948	-2.83918	BC064790	Hmgb1	high mobility group box 1		0.779105	1.28352
10351037	-0.358552	11.1104	-2.7784	0.0298204	0.738284	-3.22576	NR_002840	Gas5	growth arrest specific 5		0.779947	1.28214
10368343	-0.353954	8.22955	-3.8862	0.00707963	0.705227	-2.15196	NM_007482	Arg1	arginase, liver	Arg1	0.782437	1.27806
10479483	-0.352005	5.05297	-3.21213	0.0166302	0.717948	-2.77788	ENSMUST00000108875	Birc7	baculoviral IAP repeat-containing 7 (livin)	Birc7	0.783494	1.27633
10454807	-0.348609	7.56845	-2.94325	0.0238154	0.7201	-3.05178	NR_002905	Snora74a	small nucleolar RNA, H	X94291	0.785341	1.27333
10470905	-0.348076	6.43201	-3.91605	0.00682776	0.700098	-2.12634	AK031561	Set	SET translocation	Set	0.785631	1.27286
10572739	-0.347449	5.49594	-2.35324	0.0539831	0.747596	-3.69116	AK032580	ENSMUSG00000060719	predicted gene, ENSMUSG00000060719		0.785973	1.27231
10564520	-0.347286	6.91957	-3.06803	0.0201349	0.717948	-2.92308	AF357384	Rpl23	ribosomal protein L23		0.786062	1.27217
10395409	-0.34701	5.33286	-3.1005	0.0192807	0.717948	-2.89002	NM_008584	Meox2	mesenchyme homeobox 2	Meox2	0.786212	1.27192
10442112	-0.346277	4.22797	-2.4621	0.0463005	0.742364	-3.57017	NM_001104542	Vmn2r93	vomeronasal 2, receptor 93		0.786612	1.27128
10400967	-0.346191	7.22341	-3.95695	0.00649855	0.698833	-2.09153	NM_009189	Six1	sine oculis-related homeobox 1 homolog (Drosophila)	Six1	0.786658	1.2712
10559782	-0.34589	4.95177	-3.80789	0.00779047	0.705227	-2.22003	NM_146914	Olfr5	olfactory receptor 5	Olfr5	0.786822	1.27093
10554204	-0.344633	4.58845	-2.75776	0.0306789	0.738284	-3.24784	NM_172902	Agbl1	ATP	DQ867033	0.787508	1.26983
10445241	-0.343379	7.94105	-3.71549	0.00873214	0.705227	-2.30193	NM_178589	Tnfrsf21	tumor necrosis factor receptor superfamily, member 21	Tnfrsf21	0.788193	1.26872
10554118	-0.341975	5.02452	-2.51433	0.0430273	0.738284	-3.5125	NM_001013811	EG434197	predicted gene, EG434197	EG434197	0.788961	1.26749
10493108	-0.338021	10.2657	-2.84195	0.0273337	0.737203	-3.15819	NM_007759	Crabp2	cellular retinoic acid binding protein II	Crabp2	0.791126	1.26402
10556701	-0.337883	4.94292	-2.84395	0.0272591	0.737203	-3.15608	NM_178758	Acsm5	acyl-CoA synthetase medium-chain family member 5	Acsm5	0.791201	1.2639
10604008	-0.337628	2.49941	-3.04561	0.0207484	0.717948	-2.94601	NM_001110250	RP23-418H15.1	novel protein identical to Xlr-related, meiosis regulated Xmr	RP23-110D11.1	0.791341	1.26368
10461162	-0.337357	7.72854	-2.3544	0.0538944	0.747596	-3.68986	NR_004445	Snord22	small nucleolar RNA, C		0.79149	1.26344
10454198	-0.336465	5.06303	-2.38528	0.0515937	0.746416	-3.65546	NM_026301	Rnf125	ring finger protein 125	Rnf125	0.79198	1.26266
10580382	-0.335919	6.76175	-2.77401	0.0300008	0.738284	-3.23045	NM_001081324	Neto2	neuropilin (NRP) and tolloid (TLL)-like 2	Neto2	0.792279	1.26218
10510150	-0.335779	5.39236	-2.55533	0.0406276	0.738284	-3.46742	BC085112	OTTMUSG00000010673	predicted gene, OTTMUSG00000010673	OTTMUSG00000010965	0.792356	1.26206
10498386	-0.333859	6.33263	-3.06832	0.0201271	0.717948	-2.92278	ENSMUST00000097075	Igsf10	immunoglobulin superfamily, member 10		0.793411	1.26038
10358389	-0.332885	5.558	-3.37286	0.0134828	0.717948	-2.62051	NM_009061	Rgs2	regulator of G-protein signaling 2	Rgs2	0.793947	1.25953
10346191	-0.331752	6.64461	-3.16162	0.0177771	0.717948	-2.82833	NM_009283	Stat1	signal transducer and activator of transcription 1	Stat1	0.794571	1.25854
10388784	-0.331566	7.96562	-4.80274	0.00247379	0.620965	-1.44441	AF357367	Rpl23a	ribosomal protein L23a		0.794674	1.25838
10547054	-0.330988	5.35133	-3.80896	0.00778025	0.705227	-2.21909	XR_034896	LOC100043759	similar to RNA polymerase II TATA box binding protein-associated factor G		0.794992	1.25787
10514556	-0.330033	4.58027	-2.69016	0.0336796	0.738284	-3.32057	AK132939	ENSMUSG00000066990	predicted gene, ENSMUSG00000066990		0.795518	1.25704
10415640	-0.329834	8.0381	-3.80315	0.00783596	0.705227	-2.22419	NR_002898	Snora65	small nucleolar RNA, H		0.795628	1.25687
10394749	-0.329109	8.35713	-2.41739	0.0493082	0.744339	-3.61974	NM_001008421	Nol10	nucleolar protein 10	Nol10	0.796028	1.25624
10417713	-0.326749	7.90547	-4.13827	0.00523608	0.687473	-1.94119	NM_011243	Rarb	retinoic acid receptor, beta	Rarb	0.797331	1.25418
10385774	-0.325804	4.18352	-3.63287	0.00968069	0.705227	-2.37661	NM_207253	Olfr1371	olfactory receptor 1371	Olfr1381	0.797853	1.25336
10491313	-0.325749	6.71532	-3.23657	0.016104	0.717948	-2.75363	NM_008770	Cldn11	claudin 11	Cldn11	0.797884	1.25331
10448262	-0.323881	6.53759	-3.63199	0.00969136	0.705227	-2.37741	NM_001033496	Zfp213	zinc finger protein 213	Zfp213	0.798918	1.25169
10461158	-0.323641	11.2825	-2.81123	0.0285072	0.738284	-3.19078	AK051045	Snhg1	small nucleolar RNA host gene (non-protein coding) 1		0.799051	1.25149
10391061	-0.323162	4.16453	-3.95105	0.00654493	0.698833	-2.09653	NM_008470	Krt16	keratin 16	Krt16	0.799316	1.25107
10552622	-0.322592	8.16114	-2.78188	0.0296784	0.738284	-3.22205	BC059896	2410002F23Rik	RIKEN cDNA 2410002F23 gene	2410002F23Rik	0.799632	1.25058
10458938	-0.322555	6.84295	-2.97949	0.0226772	0.718007	-3.01413	XR_034377	EG667360	predicted gene, EG667360		0.799652	1.25054
10491877	-0.322328	5.5279	-4.46	0.00361272	0.658413	-1.69028	NM_028667	D3Ertd751e	DNA segment, Chr 3, ERATO Doi 751, expressed	D3Ertd751e	0.799778	1.25035
10471833	-0.322184	6.55434	-2.53877	0.0415792	0.738284	-3.4856	NM_010710	Lhx2	LIM homeobox protein 2	Lhx2	0.799858	1.25022
10366746	-0.320349	7.94879	-3.28763	0.0150623	0.717948	-2.70334	NM_177152	Lrig3	leucine-rich repeats and immunoglobulin-like domains 3	Lrig3	0.800876	1.24863
10600355	-0.32021	8.06633	-2.90184	0.0251914	0.728496	-3.09508	NR_002899	Snora70	small nucleolar RNA, H	NR_002899	0.800953	1.24851
10513266	-0.316098	5.20552	-3.2165	0.0165348	0.717948	-2.77354	NM_146920	Olfr267	olfactory receptor 267	Olfr267	0.803239	1.24496
10406614	-0.315044	7.50319	-3.30248	0.0147734	0.717948	-2.68881	AK090249	LOC238771	similar to Metaxin 1		0.803827	1.24405
10583314	-0.312807	10.3053	-3.35443	0.0138085	0.717948	-2.6383	BC056964	Josd3	Josephin domain containing 3		0.805074	1.24212
10536949	-0.311887	5.60255	-4.41308	0.00380998	0.658413	-1.72563	NM_177204	D330017J20Rik	RIKEN cDNA D330017J20 gene	D330017J20Rik	0.805588	1.24133
10512322	-0.310692	8.62732	-2.62153	0.0370445	0.738284	-3.39503	NM_011888	Ccl19	chemokine (C-C motif) ligand 19	Ccl19	0.806255	1.2403
10491171	-0.31028	10.5853	-3.34729	0.0139369	0.717948	-2.64521	NM_031197	Slc2a2	solute carrier family 2 (facilitated glucose transporter), member 2	Slc2a2	0.806485	1.23995
10420657	-0.309278	7.26199	-2.81808	0.0282406	0.738284	-3.1835	ENSMUST00000074266	EG432865	predicted gene, EG432865	EG432865	0.807045	1.23909
10403322	-0.308604	3.5986	-2.42054	0.0490903	0.744339	-3.61625	NM_030611	Akr1c6	aldo-keto reductase family 1, member C6	Akr1c6	0.807423	1.23851
10482496	-0.307137	6.95597	-3.96304	0.00645106	0.698833	-2.08637	ENSMUST00000102769	2010311D03Rik	RIKEN cDNA 2010311D03 gene	2010311D03Rik	0.808244	1.23725
10377560	-0.307107	6.70875	-3.81782	0.00769613	0.705227	-2.21133	NM_026991	Sat2	spermidine	ENSMUST00000108656	0.808261	1.23722
10570668	-0.305738	5.9434	-4.24413	0.00462631	0.671165	-1.85642	NM_007850	Defcr3	defensin related cryptdin 3	Defcr24	0.809028	1.23605
10373640	-0.305533	4.77348	-3.2275	0.0162972	0.717948	-2.76262	NM_146929	Olfr807	olfactory receptor 807	Olfr807	0.809143	1.23587
10398455	-0.304944	5.81962	-2.49422	0.044258	0.741718	-3.53467	ENSMUST00000065483	Ppp2r5c	protein phosphatase 2, regulatory subunit B (B56), gamma isoform	Ppp2r5c	0.809474	1.23537
10528788	-0.304176	5.67006	-2.54279	0.041346	0.738284	-3.48118	ENSMUST00000072180	ENSMUSG00000059244	predicted gene, ENSMUSG00000059244		0.809905	1.23471
10442779	-0.30261	5.33963	-2.40266	0.0503435	0.744339	-3.63612	NM_053260	Prss29	protease, serine, 29	Prss29	0.810784	1.23337
10489958	-0.301804	7.25842	-3.60682	0.0100028	0.70959	-2.40044	NM_001081134	Kcng1	potassium voltage-gated channel, subfamily G, member 1	Kcng1	0.811237	1.23269
10554150	-0.300864	7.54099	-2.5131	0.0431012	0.738284	-3.51385	NM_177740	Rgma	RGM domain family, member A	Rgma	0.811766	1.23188
10453487	-0.300749	3.13095	-2.87905	0.0259845	0.733729	-3.11903	NM_013582	Lhcgr	luteinizing hormone	ENSMUST00000024916	0.811831	1.23178
10399232	-0.300527	5.91156	-3.08748	0.0196183	0.717948	-2.90325	ENSMUST00000101635	ENSMUSG00000073242	predicted gene, ENSMUSG00000073242		0.811956	1.23159
10421100	-0.298307	6.42668	-3.00182	0.0220049	0.718007	-2.99103	NM_008691	Nefm	neurofilament, medium polypeptide	Nefm	0.813206	1.2297
10583297	-0.296921	9.54762	-2.52638	0.0423071	0.738284	-3.49923	NM_029248	Josd3	Josephin domain containing 3	Josd3	0.813988	1.22852
10428407	-0.295838	5.40079	-2.86049	0.0266502	0.736122	-3.13859	NM_175502	Tmem74	transmembrane protein 74	Tmem74	0.814599	1.2276
10450872	-0.295061	3.61997	-2.84504	0.0272185	0.737203	-3.15492	NM_146515	Olfr99	olfactory receptor 99	Olfr99	0.815038	1.22694
10397629	-0.295014	3.2093	-2.34786	0.0543952	0.748266	-3.69716	XM_991883	LOC667688	ribosomal protein L17 pseudogene		0.815065	1.2269
10485633	-0.294422	5.67278	-2.47024	0.0457734	0.742364	-3.56116	ENSMUST00000099651	ENSMUSG00000074989	predicted gene, ENSMUSG00000074989		0.815399	1.22639
10587880	-0.294311	6.66546	-2.61613	0.0373241	0.738284	-3.40092	NM_029620	Pcolce2	procollagen C-endopeptidase enhancer 2	Pcolce2	0.815462	1.2263
10362937	-0.293728	6.66387	-3.18816	0.0171642	0.717948	-2.80176	XR_033499	EG629573	predicted gene, EG629573		0.815791	1.2258
10455065	-0.293603	3.84686	-3.55448	0.0106861	0.712836	-2.44873	NM_053130	Pcdhb5	protocadherin beta 5	Pcdhb5	0.815862	1.2257
10500543	-0.293488	10.3267	-2.96149	0.0232351	0.718198	-3.0328	XR_034745	EG545555	predicted gene, EG545555	EG666007	0.815927	1.2256
10367305	-0.29311	7.31187	-3.68241	0.00909912	0.705227	-2.33167	NM_172790	Ankrd52	ankyrin repeat domain 52	Ankrd52	0.816141	1.22528
10594911	-0.292928	7.43525	-2.83498	0.0275952	0.738284	-3.16557	NM_009359	Tex9	testis expressed gene 9	Tex9	0.816244	1.22512
10535497	-0.292864	4.04115	-3.46694	0.0119458	0.716404	-2.53071	BC052346	4921520G13Rik	RIKEN cDNA 4921520G13 gene	4921520G13Rik	0.81628	1.22507
10352143	-0.29233	7.00774	-4.51116	0.00341046	0.658413	-1.65219	BC120791	D230039L06Rik	RIKEN cDNA D230039L06 gene	D230039L06Rik	0.816582	1.22462
10369481	-0.291077	8.69048	-3.74024	0.00846816	0.705227	-2.27982	NM_207000	H2afy2	H2A histone family, member Y2	H2afy2	0.817292	1.22355
10396877	-0.29101	6.4943	-4.09796	0.00549128	0.689087	-1.97405	NM_001081421	Galntl1	UDP-N-acetyl-alpha-D-galactosamine:polypeptide N-acetylgalactosaminyltransferase-like 1	Galntl1	0.81733	1.2235
10476560	-0.290598	6.44573	-2.5819	0.0391478	0.738284	-3.43831	NM_001126490	5430433G21Rik	RIKEN cDNA 5430433G21 gene	5430433G21Rik	0.817563	1.22315
10586448	-0.290303	10.267	-3.53566	0.0109442	0.712836	-2.46623	NM_026515	2810417H13Rik	RIKEN cDNA 2810417H13 gene	2810417H13Rik	0.81773	1.2229
10367519	-0.290011	3.88588	-2.94674	0.0237034	0.719589	-3.04816	NM_146928	Olfr808	olfactory receptor 808	Olfr808	0.817896	1.22265
10562152	-0.288466	4.93047	-4.97354	0.00206106	0.596685	-1.32975	NM_010758	Mag	myelin-associated glycoprotein	Mag	0.818772	1.22134
10355611	-0.28758	7.30819	-3.57318	0.0104362	0.711537	-2.43141	NM_029888	Zfp142	zinc finger protein 142	Zfp142	0.819275	1.22059
10549886	-0.287302	7.07353	-2.84619	0.0271757	0.737203	-3.1537	AF365933	Zfp264	zinc finger protein 264		0.819433	1.22036
10604424	-0.285948	8.83901	-3.11978	0.0187921	0.717948	-2.87049	NM_153532	Zfp280c	zinc finger protein 280c	Zfp280c	0.820203	1.21921
10378549	-0.28571	5.84945	-2.57566	0.0394897	0.738284	-3.44513	NM_177708	Rtn4rl1	reticulon 4 receptor-like 1	Rtn4rl1	0.820338	1.21901
10382838	-0.285231	7.45477	-4.16494	0.00507448	0.683678	-1.91963	BC055707	1810032O08Rik	RIKEN cDNA 1810032O08 gene	1810032O08Rik	0.82061	1.21861
10471882	-0.284948	5.94472	-3.27832	0.0152467	0.717948	-2.71247	NM_172854	Olfml2a	olfactomedin-like 2A	Olfml2a	0.820771	1.21837
10400155	-0.284606	5.71476	-4.34849	0.00410143	0.658413	-1.77498	ENSMUST00000066043	Nova1	neuro-oncological ventral antigen 1		0.820966	1.21808
10499975	-0.283416	3.43973	-2.52525	0.0423736	0.738284	-3.50047	ENSMUST00000076768	Tdpoz1	TD and POZ domain containing 1	Tdpoz1	0.821643	1.21707
10403821	-0.282563	3.7576	-2.8117	0.0284886	0.738284	-3.19028	ENSMUST00000103558	Tcrg-V3	T-cell receptor gamma, variable 3		0.822129	1.21635
10604682	-0.282549	3.59545	-3.24733	0.0158783	0.717948	-2.74299	BC147598	Gm648	gene model 648, (NCBI)	Gm648	0.822137	1.21634
10387170	-0.282215	7.2943	-3.43142	0.0125024	0.717948	-2.56441	NM_008744	Ntn1	netrin 1	Ntn1	0.822327	1.21606
10458870	-0.281693	8.61358	-2.51651	0.0428959	0.738284	-3.51009	XR_034277	EG628477	predicted gene, EG628477		0.822625	1.21562
10580990	-0.281673	4.4318	-3.23107	0.0162208	0.717948	-2.75908	NM_001039154	Cdh8	cadherin 8	Cdh8	0.822636	1.2156
10442057	-0.281322	9.30742	-2.81794	0.028246	0.738284	-3.18364	NM_025934	Riok2	RIO kinase 2 (yeast)	Riok2	0.822836	1.21531
10414493	-0.280855	3.27792	-2.86054	0.0266485	0.736122	-3.13854	NM_001011837	Olfr748	olfactory receptor 748	Olfr748	0.823103	1.21491
10466620	-0.280372	4.19688	-2.82784	0.027866	0.738284	-3.17314	XM_891145	EG626549	predicted gene, EG626549		0.823379	1.21451
10559547	-0.279822	5.84248	-3.01206	0.021704	0.718007	-2.98047	NM_011618	Tnnt1	troponin T1, skeletal, slow	Tnnt1	0.823693	1.21405
10467653	-0.279457	8.87688	-2.76516	0.0303685	0.738284	-3.23992	NM_199447	Rrp12	ribosomal RNA processing 12 homolog (S. cerevisiae)	Rrp12	0.823901	1.21374
10519484	-0.27865	5.9844	-3.92203	0.00677852	0.699214	-2.12124	AK141701	Steap2	six transmembrane epithelial antigen of prostate 2		0.824362	1.21306
10410207	-0.278386	7.62607	-2.63849	0.0361815	0.738284	-3.37658	ENSMUST00000031862	Cbx3	chromobox homolog 3 (Drosophila HP1 gamma)	Cbx3	0.824513	1.21284
10363170	-0.278051	6.10916	-3.37927	0.0133715	0.717948	-2.61433	NR_003618	1700060H10Rik	RIKEN cDNA 1700060H10 gene	1700060H10Rik	0.824704	1.21256
10578938	-0.277597	4.2887	-3.23839	0.0160656	0.717948	-2.75183	NM_001033429	Trim75	tripartite motif-containing 75	Trim75	0.824964	1.21217
10350975	-0.277335	5.06183	-3.03933	0.0209235	0.717948	-2.95244	ENSMUST00000097514	ENSMUSG00000073528	predicted gene, ENSMUSG00000073528		0.825114	1.21195
10360324	-0.276865	6.02624	-2.47993	0.0451545	0.742364	-3.55045	XR_030924	LOC100045972	similar to high mobility group box 1		0.825383	1.21156
10478847	-0.276461	9.23189	-3.07986	0.0198191	0.717948	-2.91102	NM_001081005	1500012F01Rik	RIKEN cDNA 1500012F01 gene	1500012F01Rik	0.825614	1.21122
10403919	-0.276337	6.06266	-3.07758	0.0198795	0.717948	-2.91334	NM_016684	Zscan12	zinc finger and SCAN domain containing 12	Zscan12	0.825685	1.21112
10481496	-0.275661	5.39476	-2.37162	0.0525983	0.746416	-3.67066	ENSMUST00000100212	OTTMUSG00000016805	predicted gene, OTTMUSG00000016805		0.826072	1.21055
10453276	-0.274994	8.48638	-3.29949	0.014831	0.717948	-2.69173	EF222207	Thada	thyroid adenoma associated	Thada	0.826453	1.20999
10371603	-0.274842	6.53112	-2.82446	0.0279954	0.738284	-3.17673	AK132809	EG626115	predicted gene, EG626115	EG626115	0.826541	1.20986
10402383	-0.273989	4.26727	-2.68275	0.0340265	0.738284	-3.32858	NM_026687	Serpina1f	serine (or cysteine) peptidase inhibitor, clade A, member 1f	Serpina1f	0.82703	1.20915
10608429	-0.273954	2.83261	-2.35704	0.053694	0.747596	-3.68693	ENSMUST00000111385	LOC380994	similar to Sycp3 like Y-linked		0.82705	1.20912
10527530	-0.273909	8.49143	-3.17272	0.0175179	0.717948	-2.8172	NM_019647	Rpl21	ribosomal protein L21	Rpl21	0.827075	1.20908
10527012	-0.273438	6.97199	-3.04636	0.0207274	0.717948	-2.94523	NM_008494	Lfng	LFNG O-fucosylpeptide 3-beta-N-acetylglucosaminyltransferase	Lfng	0.827345	1.20869
10392791	-0.272796	7.56646	-3.09268	0.0194827	0.717948	-2.89796	BC122876	1500005I02Rik	RIKEN cDNA 1500005I02 gene	1500005I02Rik	0.827714	1.20815
10508972	-0.272674	5.94472	-2.65881	0.035175	0.738284	-3.35451	BC080727	434166	predicted gene, 434166		0.827784	1.20804
10514491	-0.271311	3.42976	-2.98065	0.0226417	0.718007	-3.01293	NM_001100182	Cyp2j12	cytochrome P450, family 2, subfamily j, polypeptide 12		0.828566	1.2069
10542401	-0.271059	6.01588	-2.79801	0.0290285	0.738284	-3.20485	NM_178776	BC049715	cDNA sequence BC049715	BC049715	0.828711	1.20669
10598407	-0.270301	4.35679	-3.48817	0.011626	0.716404	-2.51069	XM_906012	EG236622	predicted gene, EG236622		0.829146	1.20606
10379840	-0.27	7.67166	-3.28496	0.0151149	0.717948	-2.70596	BC007156	Myo19	myosin XIX	Myo19	0.829319	1.20581
10477069	-0.269874	7.49479	-2.50709	0.0434661	0.738284	-3.52047	NM_009328	Tcf15	transcription factor 15	Tcf15	0.829392	1.2057
10408094	-0.269696	9.95794	-2.37395	0.052426	0.746416	-3.66807	NM_178185	Hist1h2ao	histone cluster 1, H2ao	Hist1h2an	0.829494	1.20555
10400544	-0.268693	7.25234	-2.79654	0.0290871	0.738284	-3.20642	ENSMUST00000074828	EG433125	predicted gene, EG433125	EG433125	0.830071	1.20472
10484563	-0.268381	4.54281	-3.23294	0.0161811	0.717948	-2.75723	NM_146577	Olfr1043	olfactory receptor 1043	Olfr1043	0.830251	1.20446
10409464	-0.268304	9.32617	-3.05628	0.0204539	0.717948	-2.93508	NM_019813	Dbn1	drebrin 1	Dbn1	0.830295	1.20439
10572241	-0.267784	6.40035	-2.68505	0.0339183	0.738284	-3.32609	NM_001024954	Pbx4	pre-B-cell leukemia homeobox 4	Pbx4	0.830594	1.20396
10371583	-0.267713	3.58089	-4.00513	0.00613312	0.698833	-2.05095	BC028536	ENSMUSG00000058934	predicted gene, ENSMUSG00000058934		0.830635	1.2039
10417176	-0.265169	7.21938	-2.649	0.0356568	0.738284	-3.36515	NM_009574	Zic2	zinc finger protein of the cerebellum 2	Zic2	0.832101	1.20178
10538305	-0.264874	5.49003	-3.32028	0.0144347	0.717948	-2.67144	ENSMUST00000070587	5730596B20Rik	RIKEN cDNA 5730596B20 gene		0.832271	1.20153
10502417	-0.263571	8.00334	-3.75903	0.00827369	0.705227	-2.26312	BC016099	2410002F23Rik	RIKEN cDNA 2410002F23 gene	2410002F23Rik	0.833024	1.20045
10558400	-0.263306	3.85193	-3.96968	0.00639972	0.698833	-2.08076	ENSMUST00000097983	Nps	neuropeptide S		0.833176	1.20023
